# Supplementary material for: Genome-wide identification and analysis of small RNAs originated from natural antisense transcripts in Oryza sativa
Source: HighWire-hosted journal article supplement (doi:10.1101/gr.084806.108), 2008-10-29
Supplement: supp_legends_and_Fig_S1.pdf [file supp_legends_and_Fig_S1.pdf]

Supplemental materials:  
Genome-wide identification and characterization of small RNAs  
originated from natural antisense transcripts in *Oryza sativa*

Xuefeng Zhou<sup>1</sup>, Ramanjulu Sunkar<sup>3</sup>, Hailing Jin<sup>4</sup>, Jian-Kang Zhu<sup>5</sup> and Weixiong Zhang<sup>1,2 \*</sup>

<sup>1</sup>Department of Computer Science and Engineering

<sup>2</sup>Department of Genetics

Washington University in St. Louis

Saint Louis, MO 63130-4899

<sup>3</sup>Department of Biochemistry and Molecular Biology

Oklahoma State University, Stillwater, OK 74078

<sup>4</sup>Departments of Plant Pathology and Microbiology

Center for Plant Cell Biology and Institute for Integrative Genome Biology

<sup>5</sup>Department of Botany and Plant Sciences

University of California, Riverside, CA 92521

October 1, 2008

---

\*Corresponding to: Weixiong Zhang, Department of Computer Science and Engineering, Washington University in St. Louis, MO 63130; email: zhang@cse.wustl.edu; phone: (314)935-8788; fax: (314)935-7302.

- **Table S1:** Total number of endogenous small RNAs from CSRDB, MPSS and our stress library dataset that match all protein-coding genes, cis-NATs, overlapping regions of cis-NATs, trans-NATs, and overlapping regions of trans-NATs in *O. sativa*.(see file suppl\_table1.pdf)
- **Table S2:** List of cisNATs in *O. sativa* that give rise to small RNAs in the control, drought and salt libraries.(see file suppl\_table2.pdf)
- **Table S3:** Numbers of trans-NATs in *O. sativa* that spawn small RNAs under different conditions/stages in MPSS dataset.(see file suppl\_table3.pdf)
- **Table S4:** All cisNATs identified from genome.(see file Table\_S4\_all\_cisNAT.xls)
- **Table S5:** *O. sativa* cisNATs whose overlapping regions give rise to small RNAs. (see file Table\_S5\_cisNAT\_deriving\_sRNAs.xls)
- **Table S6:** *O. sativa* transNATs whose overlapping regions give rise to small RNAs. Totally, we identified 7,142 transNATs in *O. sativa* genome, 7,141 of them derive small RNAs from their overlapping regions. (see file Table\_S6\_transNAT\_deriving\_sRNAs.xls)
- **Table S7:** All unique small RNAs that derived from the overlapping regions of *O. sativa* cisNATs. (see file Table\_S7\_all\_cisNAT\_overlap\_sRNA.txt)
- **Table S8:** All unique small RNAs that derived from the whole regions of *O. sativa* cisNAT genes. All of these cisNAT give rise to small RNAs from their overlapping regions. (see file Table\_S8\_all\_cisNAT\_genes\_sRNA.txt)
- **Table S9:** All unique small RNAs that derived from the overlapping regions of *O. sativa* transNATs. (see file Table\_S9\_all\_transNAT\_overlap\_sRNA.txt)
- **Table S10:** All unique small RNAs that derived from the whole regions of *O. sativa* transNAT genes. All of these transNAT give rise to small RNAs from their overlapping regions. (see file Table\_S10\_all\_transNAT\_genes\_sRNA.txt)

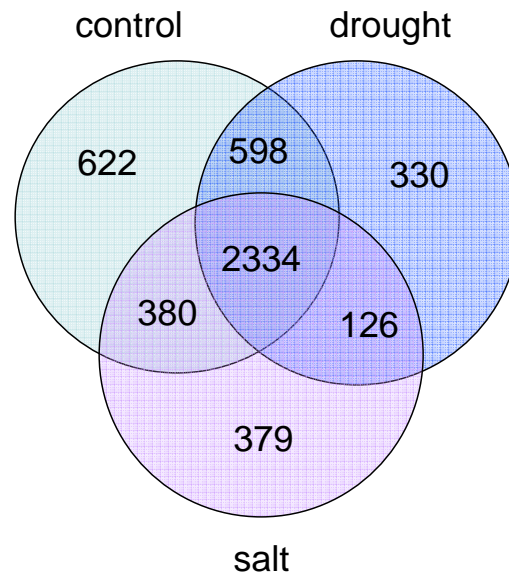

Supplemental Figure 1: Numbers of trans-NATs that produce small RNAs under control, salt and drought conditions.

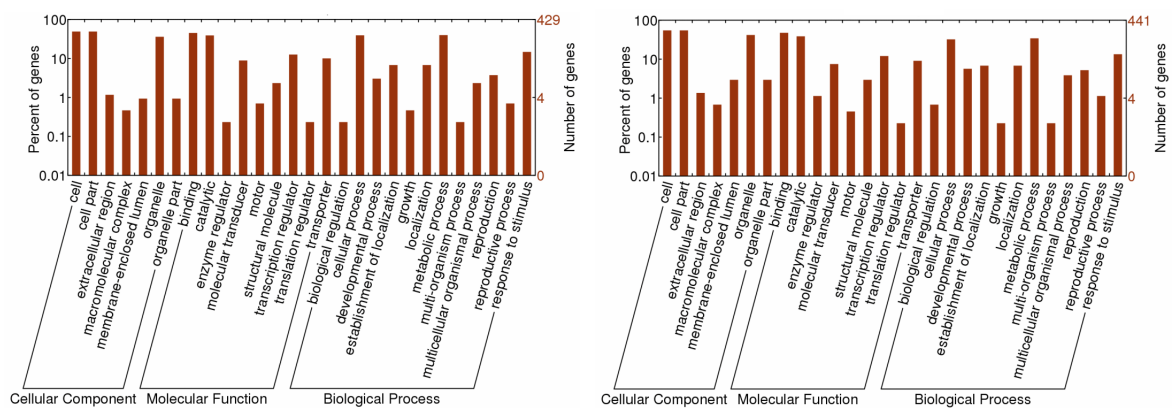

Supplemental Figure 2: Enriched GO terms in genes involved in trans-NATs that spawn siRNAs exclusively under drought (left) or salt (right) stress conditions, respectively.
