# Supplementary material for: Genome-wide identification and analysis of small RNAs originated from natural antisense transcripts in Oryza sativa
Source: HighWire-hosted journal article supplement (doi:10.1101/gr.084806.108), 2008-10-29
Supplement: suppl_table2.pdf [file suppl_table2.pdf]

Table S 2: List of cisNATs in *O. sativa*. (a),(b),(c):control, drought and salt stress conditions, respectively.

| sense      | antisense  | condition        | annotation of sense transcript                     | annotation of antisense transcript                      |
|------------|------------|------------------|----------------------------------------------------|---------------------------------------------------------|
| Os01g60640 | Os01g60650 | c <sup>(a)</sup> | OsWRKY21 - WRKY and zinc finger domains            | non-green plastid inner envelope membrane protein       |
| Os02g57060 | Os02g57070 | c                | C-terminal protease precursor, putative            | 3-5 exoribonuclease CSL4, putative                      |
| Os03g46390 | Os03g46400 | c                | ras-related protein RHN1, putative                 | flavonol-3-O-glycoside-7-O-glucosyltransferase 1        |
| Os04g23630 | Os04g23640 | c                | expressed protein                                  | ATP binding protein, putative                           |
| Os04g55420 | Os04g55424 | c                | protein binding protein, putative                  | expressed protein                                       |
| Os06g01980 | Os06g01990 | c                | cell division control protein 48 homolog C         | phosphoglycolate phosphatase, plasmid, putative         |
| Os06g40710 | Os06g40720 | c                | MYB-CC type transfactor, putative                  | calcium ion binding protein, putative                   |
| Os07g08400 | Os07g08410 | c                | ATP binding protein, putative                      | expressed protein                                       |
| Os08g29160 | Os08g29170 | c                | protein tyrosine/serine/threonine phosphatase      | quinone oxidoreductase-like protein At1g23740           |
| Os10g36634 | Os09g27980 | c                | hypothetical protein                               | transmembrane emp24 domain-containing protein           |
| Os12g39620 | Os12g39630 | c                | disease resistance protein, putative               | serine/threonine-protein kinase SAPK9, putative         |
| Os01g53720 | Os01g53730 | d <sup>(b)</sup> | ubiquitin-protein ligase/ zinc ion binding protein | patatin-like phospholipase family protein               |
| Os01g55640 | Os01g55650 | d                | receptor-like protein kinase 5 precursor           | AAP8, putative                                          |
| Os01g56000 | Os01g56010 | d                | protein kinase G11A, putative                      | transcription initiation factor, putative               |
| Os01g62880 | Os01g62890 | d                | PDE317, putative                                   | actin binding protein, putative                         |
| Os01g64770 | Os01g64780 | d                | WRKY transcription factor 19, putative             | tetratricopeptide-like helical, putative                |
| Os01g65650 | Os01g65660 | d                | metal tolerance protein C3, putative               | replication factor C subunit 3, putative                |
| Os02g43740 | Os02g43750 | d                | expressed protein                                  | expressed protein                                       |
| Os02g50560 | Os02g50570 | d                | agmatine deiminase, putative                       | expressed protein                                       |
| Os02g53040 | Os02g53050 | d                | dioxygenase RAMOSUS5, putative                     | expressed protein                                       |
| Os02g53490 | Os02g53500 | d                | expressed protein                                  | N-terminal acetyltransferase complex ARD1 subunit       |
| Os03g02762 | Os03g02770 | d                | MYND finger family protein                         | pollen-specific kinase partner protein, putative        |
| Os03g17300 | Os03g17310 | d                | serine/threonine-protein kinase AtPK19             | eukaryotic translation initiation factor 2 beta subunit |
| Os03g23909 | Os03g23920 | d                | expressed protein                                  | chlorophyllide a oxygenase, chloroplast precursor       |
| Os03g53140 | Os03g53150 | s <sup>(c)</sup> | expressed protein                                  | expressed protein                                       |
| Os04g39210 | Os04g39220 | s                | RNA recognition motif family protein               | protein Z, putative                                     |
| Os04g46470 | Os04g46480 | s                | aldose reductase, putative                         | PRA1 family protein                                     |
| Os04g54320 | Os04g54330 | s                | retrotransposon protein, putative, unclassified    | COV1-like protein, putative                             |
| Os04g57430 | Os04g57440 | s                | protein kinase, putative                           | calcium-transporting ATPase 2                           |
| Os04g57880 | Os04g57890 | s                | vegetatable incompatibility protein HET-E-1        | expressed protein                                       |
| Os04g58240 | Os04g58250 | s                | protein transport protein Sec23A, putative         | Auxin-responsive Aux/IAA gene family member             |
| Os05g39760 | Os05g39770 | s                | leucine-rich repeat, plant specific, putative      | cysteine protease 1 precursor, putative                 |
| Os06g43270 | Os06g43280 | s                | dnaJ domain containing protein                     | oligosaccharyl transferase STT3 subunit, putative       |
| Os06g50240 | Os06g50250 | s                | expressed protein                                  | ATP binding protein, putative                           |
| Os07g13969 | Os07g13980 | s                | protein transporter, putative                      | alanine-glyoxylate aminotransferase 2 homolog 2         |
| Os07g29770 | Os07g29780 | s                | protein kinase domain containing protein           | elongator component, putative                           |
| Os07g48290 | Os07g48300 | s                | SCUTL1, putative                                   | conserved hypothetical protein                          |
| Os09g39760 | Os09g39770 | s                | expressed protein                                  | glucose-1-phosphate adenyllyltransferase subunit        |
| Os10g21460 | Os10g21470 | s                | pectinesterase-2 precursor, putative               | C2 domain containing protein                            |
| Os10g41770 | Os10g41780 | s                | expressed protein                                  | expressed protein                                       |
| Os05g01480 | Os05g01490 | c d              | ras-related protein Rab11C, putative               | GTP-binding protein YPTM1, putative                     |
| Os06g44140 | Os06g44144 | c d              | transmembrane 9 superfamily protein member 4       | expressed protein                                       |
| Os09g07350 | Os09g07360 | c d              | fasciclin-like arabinogalactan protein 8           | ABI3-interacting protein 2, putative                    |
| Os01g56670 | Os01g56680 | c s              | ER degradation-enhancing alpha-mannosidase         | photosystem II reaction center W protein                |
| Os02g49230 | Os02g49240 | c s              | zinc finger protein CONSTANS-LIKE 11               | expressed protein                                       |
| Os03g13540 | Os03g13550 | c s              | purple acid phosphatase 1, putative, expressed     | oxidoreductase, putative, expressed                     |
| Os10g30590 | Os10g30600 | c s              | tetratricopeptide-like helical, putative           | protein kinase APK1A, chloroplast precursor             |
| Os02g51820 | Os02g51830 | d s              | expressed protein                                  | histidyl-tRNA synthetase, putative                      |
| Os12g06180 | Os12g06190 | d s              | pathogenicity protein PATH531-like protein         | expressed protein                                       |
